# Supplementary material for: An Exploratory Bio-Informatic Investigation of Cats’ Susceptibility to Coronavirus-Deriving Epitopes
Source: Preprints.org preprint supplement (doi:10.20944/preprints202401.2163.v1), 2024-01-31
Supplement: Supplementary file 1 [file supplementary]

*Supporting information*

**An exploratory bio-informatic investigation of cats’ susceptibility to coronavirus-deriving epitopes**

Michela Buonocore1,2, Davide De Biase3, Domenico Sorrentino3, Antonio Giordano4,5, Orlando Paciello1,* & Anna Maria D’Ursi3,*

1Department of Veterinary Medicine and Animal Production, University of Naples Federico II, Via Federico Delpino, 1, 80137 Napoli NA

2Department of Chemical Sciences and Research Centre on Bioactive Peptides (CIRPeB), University of Naples Federico II, Naples, 80138, Italy

3Department of Pharmacy, University of Salerno, via Giovanni Paolo II, 132, 84084 Fisciano, Salerno, Italy

4Sbarro Institute for Cancer Research and Molecular Medicine, Center for Biotechnology, College of Science and Technology, Temple University, Philadelphia, PA 19122, USA

5Department of Medical Biotechnologies, University of Siena, I-53100 Siena, Italy

**Table of contents**

- **Table S1.** Entries available on UniProt of alleles deriving from the three loci (E, H and K) of class-I FLA of Felis catus (Felis silvestris catus) selected for the studies. All the entries are marked as “unreviewed”)
- **Table S2.** Entries (marked as “reviewed”) available on UniProt of glycoproteins deriving from SARS-CoV-2, FIPV and FeCV.
- **Table S3.** Number of epitopes deriving from viral glycoproteins predicted by NetMHCPan with EL score > 0.5 and > 0.8 for each allele in FLA-I E locus.
- **Table S4.** Number of epitopes deriving from viral glycoproteins predicted by NetMHCPan with EL score > 0.5 and > 0.8 for each allele in FLA-I H locus.
- **Table S5.** Number of epitopes deriving from viral glycoproteins predicted by NetMHCPan with EL score > 0.5 and > 0.8 for each allele in FLA-I K locus.
- **Figure S1.** Results of the AlphaFold2 prediction through ColabFold server of the two moieties of SARS-CoV-2 R1ab between the residues 2991-4000 and 6291-6600 and FIPV R1ab residues 3501-4000. The graphs generated by ColabFold report **A)** the coverage of the sequences derived from the multiple sequence alignment (MSA) in UniRef100 server, **B)** the predicted local distance difference test (pLDDT) score for the 5 models generated and **C)** the predicted alignment error (PAE), indicating a distance score between pair of residues with low values specifying low errors.
- **Figure S2.** Results of the 50 ns classical MD simulations of sars-rEp1(3574RTIKGTHHW3582) in complex with FLA-I H*00501. The peptide was sampled in two poses (extended and helix), as derived from molecular docking results. The screenshots were taken at 5, 25 and 50 ns. The plots report from the top to the bottom: RMSD of atom position in protein backbones with respect to the system as a function of time; number of H-bonds (blue bars) and contacts within 0.35 nm (orange bars) established in the MD as a function of time; short-range Coulomb (blue line) and Lennard-Jones (orange line) energies calculated for each timestep of the MD.
- **Figure S3.** Results of the 50 ns classical MD simulations of fipv-rEp4(4533RLYYETLSY4541) in complex with FLA-I H*00501. The peptide was sampled in two poses (extended and helix), as derived from molecular docking results. The screenshots were taken at 5, 25 and 50 ns. The plots report from the top to the bottom: RMSD of atom position in protein backbones with respect to the system as a function of time; number of H-bonds (blue bars) and contacts within 0.35 nm (orange bars) established in the MD as a function of time; short-range Coulomb (blue line) and Lennard-Jones (orange line) energies calculated for each timestep of the MD.
- **Figure S4.** Results of the 50 ns classical MD simulations of sars-sEp5(625HADQLTPTW633) in complex with FLA-I E*01001. The peptide was sampled in two poses (extended and helix), as derived from molecular docking results. The screenshots were taken at 5, 25 and 50 ns. The plots report from the top to the bottom: RMSD of atom position in protein backbones with respect to the system as a function of time; number of H-bonds (blue bars) and contacts within 0.35 nm (orange bars) established in the MD as a function of time; short-range Coulomb (blue line) and Lennard-Jones (orange line) energies calculated for each timestep of the MD.
- **Figure S5.** Results of the 50 ns classical MD simulations of sars-sEp6(321QPTESIVRF329) in complex with FLA-I E*00701. The peptide was sampled in two poses (extended and helix), as derived from molecular docking results. The screenshots were taken at 5, 25 and 50 ns. The plots report from the top to the bottom: RMSD of atom position in protein backbones with respect to the system as a function of time; number of H-bonds (blue bars) and contacts within 0.35 nm (orange bars) established in the MD as a function of time; short-range Coulomb (blue line) and Lennard-Jones (orange line) energies calculated for each timestep of the MD.
- **Figure S6.** Results of the 50 ns classical MD simulations of fipv-sEp8(771TTTPNFYYY779) in complex with FLA-I H*00501. The peptide was sampled in two poses (extended and helix), as derived from molecular docking results. The screenshots were taken at 5, 25 and 50 ns. The plots report from the top to the bottom: RMSD of atom position in protein backbones with respect to the system as a function of time; number of H-bonds (blue bars) and contacts within 0.35 nm (orange bars) established in the MD as a function of time; short-range Coulomb (blue line) and Lennard-Jones (orange line) energies calculated for each timestep of the MD.
- **Figure S7.** Results of the 50 ns classical MD simulations of fipv-sEp9(1228TAYETVTAW1236)in complex with FLA-I H*00401. The peptide was sampled in two poses (extended and helix), as derived from molecular docking results. The screenshots were taken at 5, 25 and 50 ns. The plots report from the top to the bottom: RMSD of atom position in protein backbones with respect to the system as a function of time; number of H-bonds (blue bars) and contacts within 0.35 nm (orange bars) established in the MD as a function of time; short-range Coulomb (blue line) and Lennard-Jones (orange line) energies calculated for each timestep of the MD.

**Table S1.** Entries available on UniProt of alleles deriving from the three loci (E, H and K) of class-I FLA of Felis catus (Felis silvestris catus) selected for the studies. All the entries are marked as “unreviewed”)

| **FLA-I E** | | | | **FLA-I H** | | | | **FLA-I K** | | | |
| --- | --- | --- | --- | --- | --- | --- | --- | --- | --- | --- | --- |
| **Gene Names** | **Allele name** | **UniProt ID** | **Length** | **Gene Names** | **Allele name** | **UniProt ID** | **Length** | **Gene Names** | **Allele name** | **UniProt ID** | **Length** |
| FLAI-E | *00501 | A0A516V164 | 362 | FLAI-H | *00102 | S4Z0I2 | 182 | FLAI-K | *00401 | S4Z0K5 | 275 |
| FLAI-E | *00101 | S4Z0J3 | 182 | FLAI-H | *00601 | S4Z0I6 | 182 | FLAI-K | *00801 | S4Z239 | 182 |
| FLAI-E | *00701 | S4Z0J6 | 182 | FLAI-H | *003012 | S4Z242 | 182 | FLAI-K | *00701 | S4Z3H3 | 275 |
| FLAI-E | *01301 | S4Z0K0 | 182 | FLAI-H | *008011 | S4Z246 | 182 | FLAI-K | *00201 | S4Z3H8 | 362 |
| FLAI-E | *01401 | S4Z0M6 | 275 | FLAI-H | *00501 | S4Z264 | 362 | FLAI-K | *00101 | S4Z3M6 | 182 |
| FLAI-E | *01101 | S4Z253 | 182 | FLAI-H | *003011 | S4Z3F6 | 182 | FLAI-K | *00501 | S4Z3N0 | 182 |
| FLAI-E | *00303 | S4Z3G3 | 182 | FLAI-H | *00701 | S4Z3F9 | 182 | FLAI-K | *017 | S4Z3R1 | 275 |
| FLAI-E | *01001 | S4Z3G5 | 182 | FLAI-H | *00201 | S4Z3N5 | 182 | FLAI-K | *00303 | S4Z9L2 | 182 |
| FLAI-E | *00302 | S4Z3P3 | 182 | FLAI-H | *00401 | S4Z3P0 | 182 | FLAI-K | *00302 | S4Z9P2 | 362 |
| FLAI-E | *00902 | S4Z3P7 | 182 | FLAI-H | *00101 | S4Z9L5 | 182 |  |  |  |  |
| FLAI-E | *00601 | S4Z9M5 | 182 | FLAI-H | *008012 | S4Z9M3 | 182 |  |  |  |  |
| FLAI-E | *01201 | S4Z9M8 | 182 |  |  |  |  |  |  |  |  |

**Table S2.** Entries (marked as “reviewed”) available on UniProt of glycoproteins deriving from SARS-CoV-2, FIPV and FeCV.

| **Severe acute respiratory syndrome coronavirus 2 (2019-nCoV) (SARS-CoV-2) Taxonomy ID: 2697049** | | | | |
| --- | --- | --- | --- | --- |
| **Protein names** | **Entry Name** | **Gene Names** | **UniProt ID** | **Length** |
| Replicase polyprotein 1a (pp1a) (ORF1a polyprotein) | R1A_SARS2 |  | P0DTC1 | 4405 |
| Spike glycoprotein (S glycoprotein) (E2) | SPIKE_SARS2 | S 2 | P0DTC2 | 1273 |
| ORF3a protein (ORF3a) | AP3A_SARS2 | 3a | P0DTC3 | 275 |
| Envelope small membrane protein (E) (sM protein) | VEMP_SARS2 | E 4 | P0DTC4 | 75 |
| Membrane protein (M) (E1 glycoprotein) | VME1_SARS2 | M | P0DTC5 | 222 |
| ORF6 protein (ORF6) (Non-structural protein 6) (ns6) | NS6_SARS2 | 6 | P0DTC6 | 61 |
| ORF7a protein (ORF7a) (Protein U122) | NS7A_SARS2 | 7a | P0DTC7 | 121 |
| ORF8 protein (ORF8) (Non-structural protein 8) (ns8) | NS8_SARS2 | 8 | P0DTC8 | 121 |
| Nucleoprotein (N) (Nucleocapsid protein) (NC) (Protein N) | NCAP_SARS2 | N | P0DTC9 | 419 |
| Replicase polyprotein 1ab (pp1ab) (ORF1ab polyprotein) | R1AB_SARS2 | rep 1a-1b | P0DTD1 | 7096 |
| ORF9b protein (ORF9b) (ORF-9b) (Protein 9b) | ORF9B_SARS2 | 9b | P0DTD2 | 97 |
| Putative ORF9c protein (ORF9c) (ORF14) | ORF9C_SARS2 | 9c | P0DTD3 | 73 |
| ORF7b protein (ORF7b) | NS7B_SARS2 | 7b | P0DTD8 | 43 |
| Putative ORF10 protein | ORF10_SARS2 | ORF10 | A0A663DJA2 | 38 |
| Putative ORF3b protein (ORF3b) | ORF3B_SARS2 |  | P0DTF1 | 22 |
| Putative ORF3d protein | ORF3D_SARS2 |  | P0DTG0 | 57 |
| ORF3c protein (ORF3c) | ORF3C_SARS2 |  | P0DTG1 | 41 |
| **Feline coronavirus (strain FIPV WSU-79/1146) (FCoV) (Taxonomy ID: 33734)** | | | | |
| **Protein names** | **Entry Name** | **Gene Names** | **Entry** | **Length** |
| Replicase polyprotein 1ab (pp1ab) (ORF1ab polyprotein) | R1AB_FIPV | rep 1a-1b | Q98VG9 | 6709 |
| Spike glycoprotein (S glycoprotein) (E2) | SPIKE_FIPV | S 2 | P10033 | 1452 |
| Membrane protein (M protein) (E1 glycoprotein) | VME1_FIPV | M 5 | P25878 | 262 |
| Nucleoprotein (Nucleocapsid protein) (NC) (Protein N) | NCAP_FIPV | N 6 | P25909 | 377 |
| Non-structural protein 7a (ns7a) | NS7_FIPV | 7a | P19742 | 101 |
| Envelope small membrane protein (E protein) (sM protein) | VEMP_FIPV | E sM | Q52PA5 | 82 |
| Non-structural protein 3a (ns3a) | NS3A_FIPV | 3a | O39432 | 71 |
| Non-structural protein 3x (ns3x) | NS3X_FIPV | 3x | O39433 | 71 |
| Putative truncated non-structural protein 3b (ns3b) | NS3B_FIPV | 3b | P0C545 | 40 |
| Non-structural protein 7b (ns7b) | NS7B_FIPV | 7b | P19743 | 206 |
| **Feline enteric coronavirus (strain 79-1683) (FeCoV) (FeCV) (Taxonomy ID: 33733)** | | | | |
| **Protein names** | **Entry Name** | **Gene Names** | **Entry** | **Length** |
| Non-structural 7a protein (ns7a) | NS7_CVFE3 | 7a | P33465 | 101 |
| Non-structural protein 7b (ns7b) | NS7B_CVFE3 | 7b | P33467 | 176 |

**Table S3.** Number of epitopes deriving from viral glycoproteins predicted by NetMHCPan with EL score > 0.5 and > 0.8 for each allele in FLA-I E locus.

|  | **Organism** | **FeCV** | | **FIPV** | | | | | | | | | | **SARS-CoV-2** | | | | | | | | | | | **Total epitopes** |
| --- | --- | --- | --- | --- | --- | --- | --- | --- | --- | --- | --- | --- | --- | --- | --- | --- | --- | --- | --- | --- | --- | --- | --- | --- | --- |
|  | **Protein** | **NS7B** | **NS7C** | **NS3A** | **NS3X** | **NS3B** | **SPIKE** | **NS7F** | **NS7B** | **VME1** | **NCAP** | **VEMP** | **R1AB** | **R1A** | **SPIKE** | **AP3A** | **VEMP** | **VME1** | **NS6** | **NS7A** | **NS8** | **NCAP** | **R1AB** | **ORF9B** |
| **FLA-I E*00501** | EL > 0.5 | 1 | - | - | - | - | 4 | - | 1 | 1 | 1 | 2 | 22 | 18 | 7 | 1 | - | 1 | - | 1 | - | 3 | 26 | - | 89 |
| EL > 0.8 | - | - | - | - | - | - | - | - | - | - | - | 1 | - | - | - | - | - | - | - | - | - | - | - | 1 |
| **FLA-I E*00101** | EL > 0.5 | 3 | - | 1 | 1 | - | 23 | - | 1 | 3 | 4 | 2 | 89 | 67 | 21 | 4 | 1 | 2 | - | - | - | 6 | 102 | 2 | 332 |
| EL > 0.8 | - | - | - | - | - | 1 | - | - | 1 | 1 | - | 10 | 10 | 3 | - | - | - | - | 1 | - | 2 | 12 | - | 41 |
| **FLA-I E*00701** | EL > 0.5 | 1 | - | - | - | - | 5 | - | - | 1 | 2 | 1 | 23 | 18 | 7 | 2 | - | 1 | - | 1 | - | 2 | 29 | - | 93 |
| EL > 0.8 | - | - | - | - | - | - | - | - | - | - | - | 2 | 1 | - | - | - | - | - | - | - | - | 1 | - | 4 |
| **FLA-I E*01301** | EL > 0.5 | 1 | - | 1 | 1 | - | 7 | - | 1 | 3 | 1 | 2 | 37 | 33 | 7 | 1 | 1 | 3 | - | 1 | - | 4 | 52 | 3 | 159 |
| EL > 0.8 | - | - | - | - | - | - | - | - | - | - | - | - | - | - | - | - | - | - | - | - | - | 1 | - | 1 |
| **FLA-I E*01401** | EL > 0.5 | - | - | 1 | - | - | - | - | - | - | - | - | 8 | 6 | - | - | - | - | - | 1 | - | - | 14 | 1 | 31 |
| EL > 0.8 | - | - | - | - | - | - | - | - | - | - | - | - | - | - | - | - | - | - | - | - | - | - | - | 0 |
| **FLA-I E*01101** | EL > 0.5 | 1 | 1 | - | 2 | - | 19 | 1 | 2 | - | 5 | 1 | 83 | 51 | 19 | 8 | 1 | 2 | 1 | 2 | 1 | 5 | 95 | 3 | 303 |
| EL > 0.8 | - | - | - | - | - | - | - | - | - | - | - | 4 | 2 | - | 1 | - | - | - | - | - | - | 3 | 1 | 11 |
| **FLA-I E*00303** | EL > 0.5 | 1 | - | - | - | - | 1 | - | - | - | - | - | 8 | 7 | 3 | - | - | - | - | 1 | - | 2 | 8 | - | 31 |
| EL > 0.8 | - | - | - | - | - | - | - | - | - | - | - | - | - | - | - | - | - | - | - | - | - | - | - | 0 |
| **FLA-I E*01001** | EL > 0.5 | 2 | - | - | - | - | 16 | - | 1 | 2 | 4 | 3 | 41 | 42 | 7 | 5 | - | 3 | - | 1 | - | 4 | 72 | 3 | 206 |
| EL > 0.8 | - | - | - | - | - | - | - | - | - | - | - | 2 | - | - | - | - | - | - | - | - | - | - | 1 | 3 |
| **FLA-I E*00302** | EL > 0.5 | 1 | - | - | - | - | 1 | - | - | - | - | - | 8 | 7 | 3 | - | - | - | - | 1 | - | 2 | 8 | - | 31 |
| EL > 0.8 | - | - | - | - | - | - | - | - | - | - | - | - | - | - | - | - | - | - | - | - | - | - | - | 0 |
| **FLA-I E*00902** | EL > 0.5 | 1 | - | - | 1 | - | 8 | - | - | 2 | 2 | 1 | 27 | 25 | 5 | 3 | - | 2 | - | 2 | - | 3 | 44 | 3 | 129 |
| EL > 0.8 | - | - | - | - | - | - | - | - | - | - | - | - | 1 | - | - | - | - | - | - | - | - | 1 | 1 | 3 |
| **FLA-I E*00601** | EL > 0.5 | 1 | - | - | - | - | 1 | - | - | - | - | - | 2 | 4 | - | - | - | - | - | - | - | - | 4 | - | 12 |
| EL > 0.8 | - | - | - | - | - | - | - | - | - | - | - | - | - | - | - | - | - | - | - | - | - | - | - | 0 |
| **FLA-I E*01201** | EL > 0.5 | - | - | 1 | - | - | 1 | - | 2 | 1 | 1 | - | 20 | 18 | 4 | 2 | - | - | - | - | - | 2 | 28 | 1 | 81 |
| EL > 0.8 | - | - | - | - | - | - | - | - | - | - | - | - | 3 | - | - | - | - | - | - | - | 1 | 4 | - | 8 |

**Table S4.** Number of epitopes deriving from viral glycoproteins predicted by NetMHCPan with EL score > 0.5 and > 0.8 for each allele in FLA-I H locus.

|  | **Organism** | **FeCV** | | **FIPV** | | | | | | | | | | **SARS-CoV-2** | | | | | | | | | | | **Total epitopes** |
| --- | --- | --- | --- | --- | --- | --- | --- | --- | --- | --- | --- | --- | --- | --- | --- | --- | --- | --- | --- | --- | --- | --- | --- | --- | --- |
|  | **Protein** | **NS7B** | **NS7C** | **NS3A** | **NS3X** | **NS3B** | **SPIKE** | **NS7F** | **NS7B** | **VME1** | **NCAP** | **VEMP** | **R1AB** | **R1A** | **SPIKE** | **AP3A** | **VEMP** | **VME1** | **NS6** | **NS7A** | **NS8** | **NCAP** | **R1AB** | **ORF9B** |
| **FLA-I H*00102** | EL > 0.5 | 3 | - | - | 1 | - | 22 | - | 2 | 7 | 1 | 3 | 72 | 55 | 17 | 4 | - | 3 | - | 1 | 1 | 3 | 89 | 1 | 285 |
| EL > 0.8 | - | - | - | - | - | 3 | - | - | 1 | - | - | 2 | 1 | 1 | 1 | - | - | - | - | - | - | 3 | - | 12 |
| **FLA-I H*00601** | EL > 0.5 | 2 | - | - | 1 | - | 16 | - | 1 | 4 | 2 | 2 | 53 | 35 | 12 | 2 | - | 4 | - | 2 | - | 3 | 66 | - | 205 |
| EL > 0.8 | - | - | - | - | - | 1 | - | - | - | - | - | - | 1 | - | - | - | - | - | - | - | - | 1 | - | 3 |
| **FLA-I H*003011** | EL > 0.5 | 2 | - | - | - | - | 18 | - | 3 | 6 | 2 | 2 | 44 | 35 | 8 | 6 | 1 | 3 | - | 1 | 1 | 3 | 66 | 1 | 202 |
| EL > 0.8 | - | - | - | - | - | 1 | - | - | - | - | - | - | - | - | - | - | - | - | - | - | - | 2 | - | 3 |
| **FLA-I H*00701** | EL > 0.5 | 4 | - | - | 1 | - | 30 | - | 1 | 9 | 6 | 5 | 77 | 60 | 12 | 7 | 2 | 5 | - | 1 | 1 | 4 | 106 | 1 | 332 |
| EL > 0.8 | - | - | - | - | - | 3 | - | - | 1 | 2 | 1 | 7 | 6 | 2 | 1 | - | - | - | - | - | 2 | 12 | - | 37 |
| **FLA-I H*00501** | EL > 0.5 | 3 | - | - | 1 | - | 25 | - | 1 | 6 | 5 | 4 | 70 | 52 | 13 | 7 | 1 | 4 | - | 1 | 2 | 4 | 89 | 1 | 289 |
| EL > 0.8 | - | - | - | - | - | - | - | - | - | 1 | - | 1 | 1 | - | - | - | - | - | - | - | - | 4 | - | 7 |
| **FLA-I H*00401** | EL > 0.5 | 5 | - | - | 2 | - | 36 | - | 2 | 10 | 6 | 5 | 98 | 70 | 15 | 9 | 2 | 8 | - | 2 | 1 | 5 | 125 | 1 | 402 |
| EL > 0.8 | - | - | - | - | - | 4 | - | - | 1 | 3 | - | 9 | 9 | 2 | 1 | - | - | - | - | - | 2 | 15 | - | 46 |
| **FLA-I H*008012** | EL > 0.5 | 2 | - | 1 | 1 | - | 37 | - | 1 | 14 | 6 | 4 | 126 | 92 | 24 | 8 | 3 | 8 | - | 2 | 1 | 6 | 157 | 1 | 494 |
| EL > 0.8 | - | - | - | - | - | 5 | - | - | 1 | 1 | 1 | 15 | 6 | 3 | 1 | - | - | - | - | - | - | 13 | - | 46 |
| **FLA-I H*003012** | EL > 0.5 | 2 | - | - | - | - | 18 | - | 3 | 6 | 2 | 2 | 44 | 35 | 8 | 6 | 1 | 3 | - | 1 | 1 | 3 | 66 | 1 | 202 |
| EL > 0.8 | - | - | - | - | - | 1 | - | - | - | - | - | - | - | - | - | - | - | - | - | - | - | 2 | - | 3 |
| **FLA-I H*008011** | EL > 0.5 | 2 | - | 1 | 1 | - | 37 | - | 1 | 14 | 6 | 4 | 126 | 92 | 24 | 8 | 3 | 8 | - | 2 | 1 | 6 | 157 | 1 | 494 |
| EL > 0.8 | - | - | - | - | - | 5 | - | - | 1 | 1 | 1 | 15 | 6 | 3 | 1 | - | - | - | - | - | - | 13 | - | 46 |
| **FLA-I H*00201** | EL > 0.5 | 2 | - | 1 | - | - | 23 | - | 1 | 6 | 3 | 3 | 67 | 46 | 14 | 6 | - | 3 | - | 1 | - | 2 | 87 | 1 | 266 |
| EL > 0.8 | - | - | - | - | - | - | - | - | - | - | - | - | 1 | 2 | 1 | - | - | - | - | - | - | 1 | - | 5 |
| **FLA-I H*00101** | EL > 0.5 | 3 | - | - | 1 | - | 22 | - | 2 | 7 | 1 | 3 | 72 | 55 | 17 | 4 | - | 3 | - | 1 | 1 | 3 | 89 | 1 | 285 |
| EL > 0.8 | - | - | - | - | - | 3 | - | - | 1 | - | - | 2 | 1 | 1 | 1 | - | - | - | - | - | - | 3 | - | 12 |

**Table S5.** Number of epitopes deriving from viral glycoproteins predicted by NetMHCPan with EL score > 0.5 and > 0.8 for each allele in FLA-I K locus.

|  | **Organism** | **FeCV** | | **FIPV** | | | | | | | | | | **SARS-CoV-2** | | | | | | | | | | | **Total epitopes** |
| --- | --- | --- | --- | --- | --- | --- | --- | --- | --- | --- | --- | --- | --- | --- | --- | --- | --- | --- | --- | --- | --- | --- | --- | --- | --- |
|  | **Protein** | **NS7B** | **NS7C** | **NS3A** | **NS3X** | **NS3B** | **SPIKE** | **NS7F** | **NS7B** | **VME1** | **NCAP** | **VEMP** | **R1AB** | **R1A** | **SPIKE** | **AP3A** | **VEMP** | **VME1** | **NS6** | **NS7A** | **NS8** | **NCAP** | **R1AB** | **ORF9B** |
| **FLA-I K*00401** | EL > 0.5 | 1 | - | - | - | - | 2 | - | - | - | - | - | 5 | 2 | - | 1 | - | - | - | - | - | 1 | 6 | 1 | 19 |
| EL > 0.8 | - | - | - | - | - | - | - | - | - | - | - | - | - | - | - | - | - | - | - | - | - | - | - | 0 |
| **FLA-I K*00302** | EL > 0.5 | 1 | - | - | - | - | 1 | - | 2 | 1 | 1 | - | 9 | 4 | - | 1 | - | - | - | - | - | 2 | 10 | 1 | 33 |
| EL > 0.8 | - | - | - | - | - | - | - | - | - | - | - | - | - | - | - | - | - | - | - | - | - | - | - | 0 |
| **FLA-I K*00801** | EL > 0.5 | 4 | - | - | 3 | - | 16 | - | 2 | 5 | 6 | 2 | 79 | 57 | 16 | 4 | 1 | 1 | - | 2 | 1 | 4 | 103 | 4 | 310 |
| EL > 0.8 | 1 | - | - | 2 | - | 1 | - | 1 | 1 | 1 | - | 11 | 8 | 2 | - | - | 1 | - | - | - | 1 | 19 | - | 49 |
| **FLA-I K*00201** | EL > 0.5 | - | - | - | - | - | - | - | - | - | - | - | - | - | - | - | - | - | - | - | - | - | - | - | 0 |
| EL > 0.8 | - | - | - | - | - | - | - | - | - | - | - | - | - | - | - | - | - | - | - | - | - | - | - | 0 |
| **FLA-I K*00701** | EL > 0.5 | 1 | - | - | 2 | - | 4 | - | 2 | 1 | 3 | - | 46 | 24 | 11 | 4 | - | 1 | - | 1 | - | 5 | 48 | 2 | 155 |
| EL > 0.8 | - | - | - | - | - | - | - | - | - | 1 | - | - | - | - | - | - | - | - | - | - | - | 1 | - | 2 |
| **FLA-I K*00101** | EL > 0.5 | - | - | - | - | - | - | - | - | - | - | - | - | - | - | - | - | - | - | - | - | - | - | - | 0 |
| EL > 0.8 | - | - | - | - | - | - | - | - | - | - | - | - | - | - | - | - | - | - | - | - | - | - | - | 0 |
| **FLA-I K*00501** | EL > 0.5 | 1 | - | - | - | - | 5 | - | 1 | 1 | - | 1 | 15 | 11 | 1 | 2 | - | - | - | - | - | 1 | 17 | 1 | 57 |
| EL > 0.8 | - | - | - | - | - | - | - | - | - | - | - | - | - | - | - | - | - | - | - | - | - | - | - | 0 |
| **FLA-I K*00303** | EL > 0.5 | 1 | - | - | - | - | 1 | - | 2 | 1 | 1 | - | 9 | 4 | - | 1 | - | - | - | - | - | 2 | 10 | 1 | 33 |
| EL > 0.8 | - | - | - | - | - | - | - | - | - | - | - | - | - | - | - | - | - | - | - | - | - | - | - | 0 |
| **FLA-I K*017** | EL > 0.5 | 1 | - | - | - | - | 14 | - | 2 | 1 | 6 | 3 | 60 | 53 | 11 | 4 | - | 1 | - | 2 | - | 3 | 81 | 3 | 245 |
| EL > 0.8 | - | - | - | - | - | - | - | - | - | - | - | 2 | 1 | - | - | - | - | - | - | - | - | 3 | 1 | 7 |


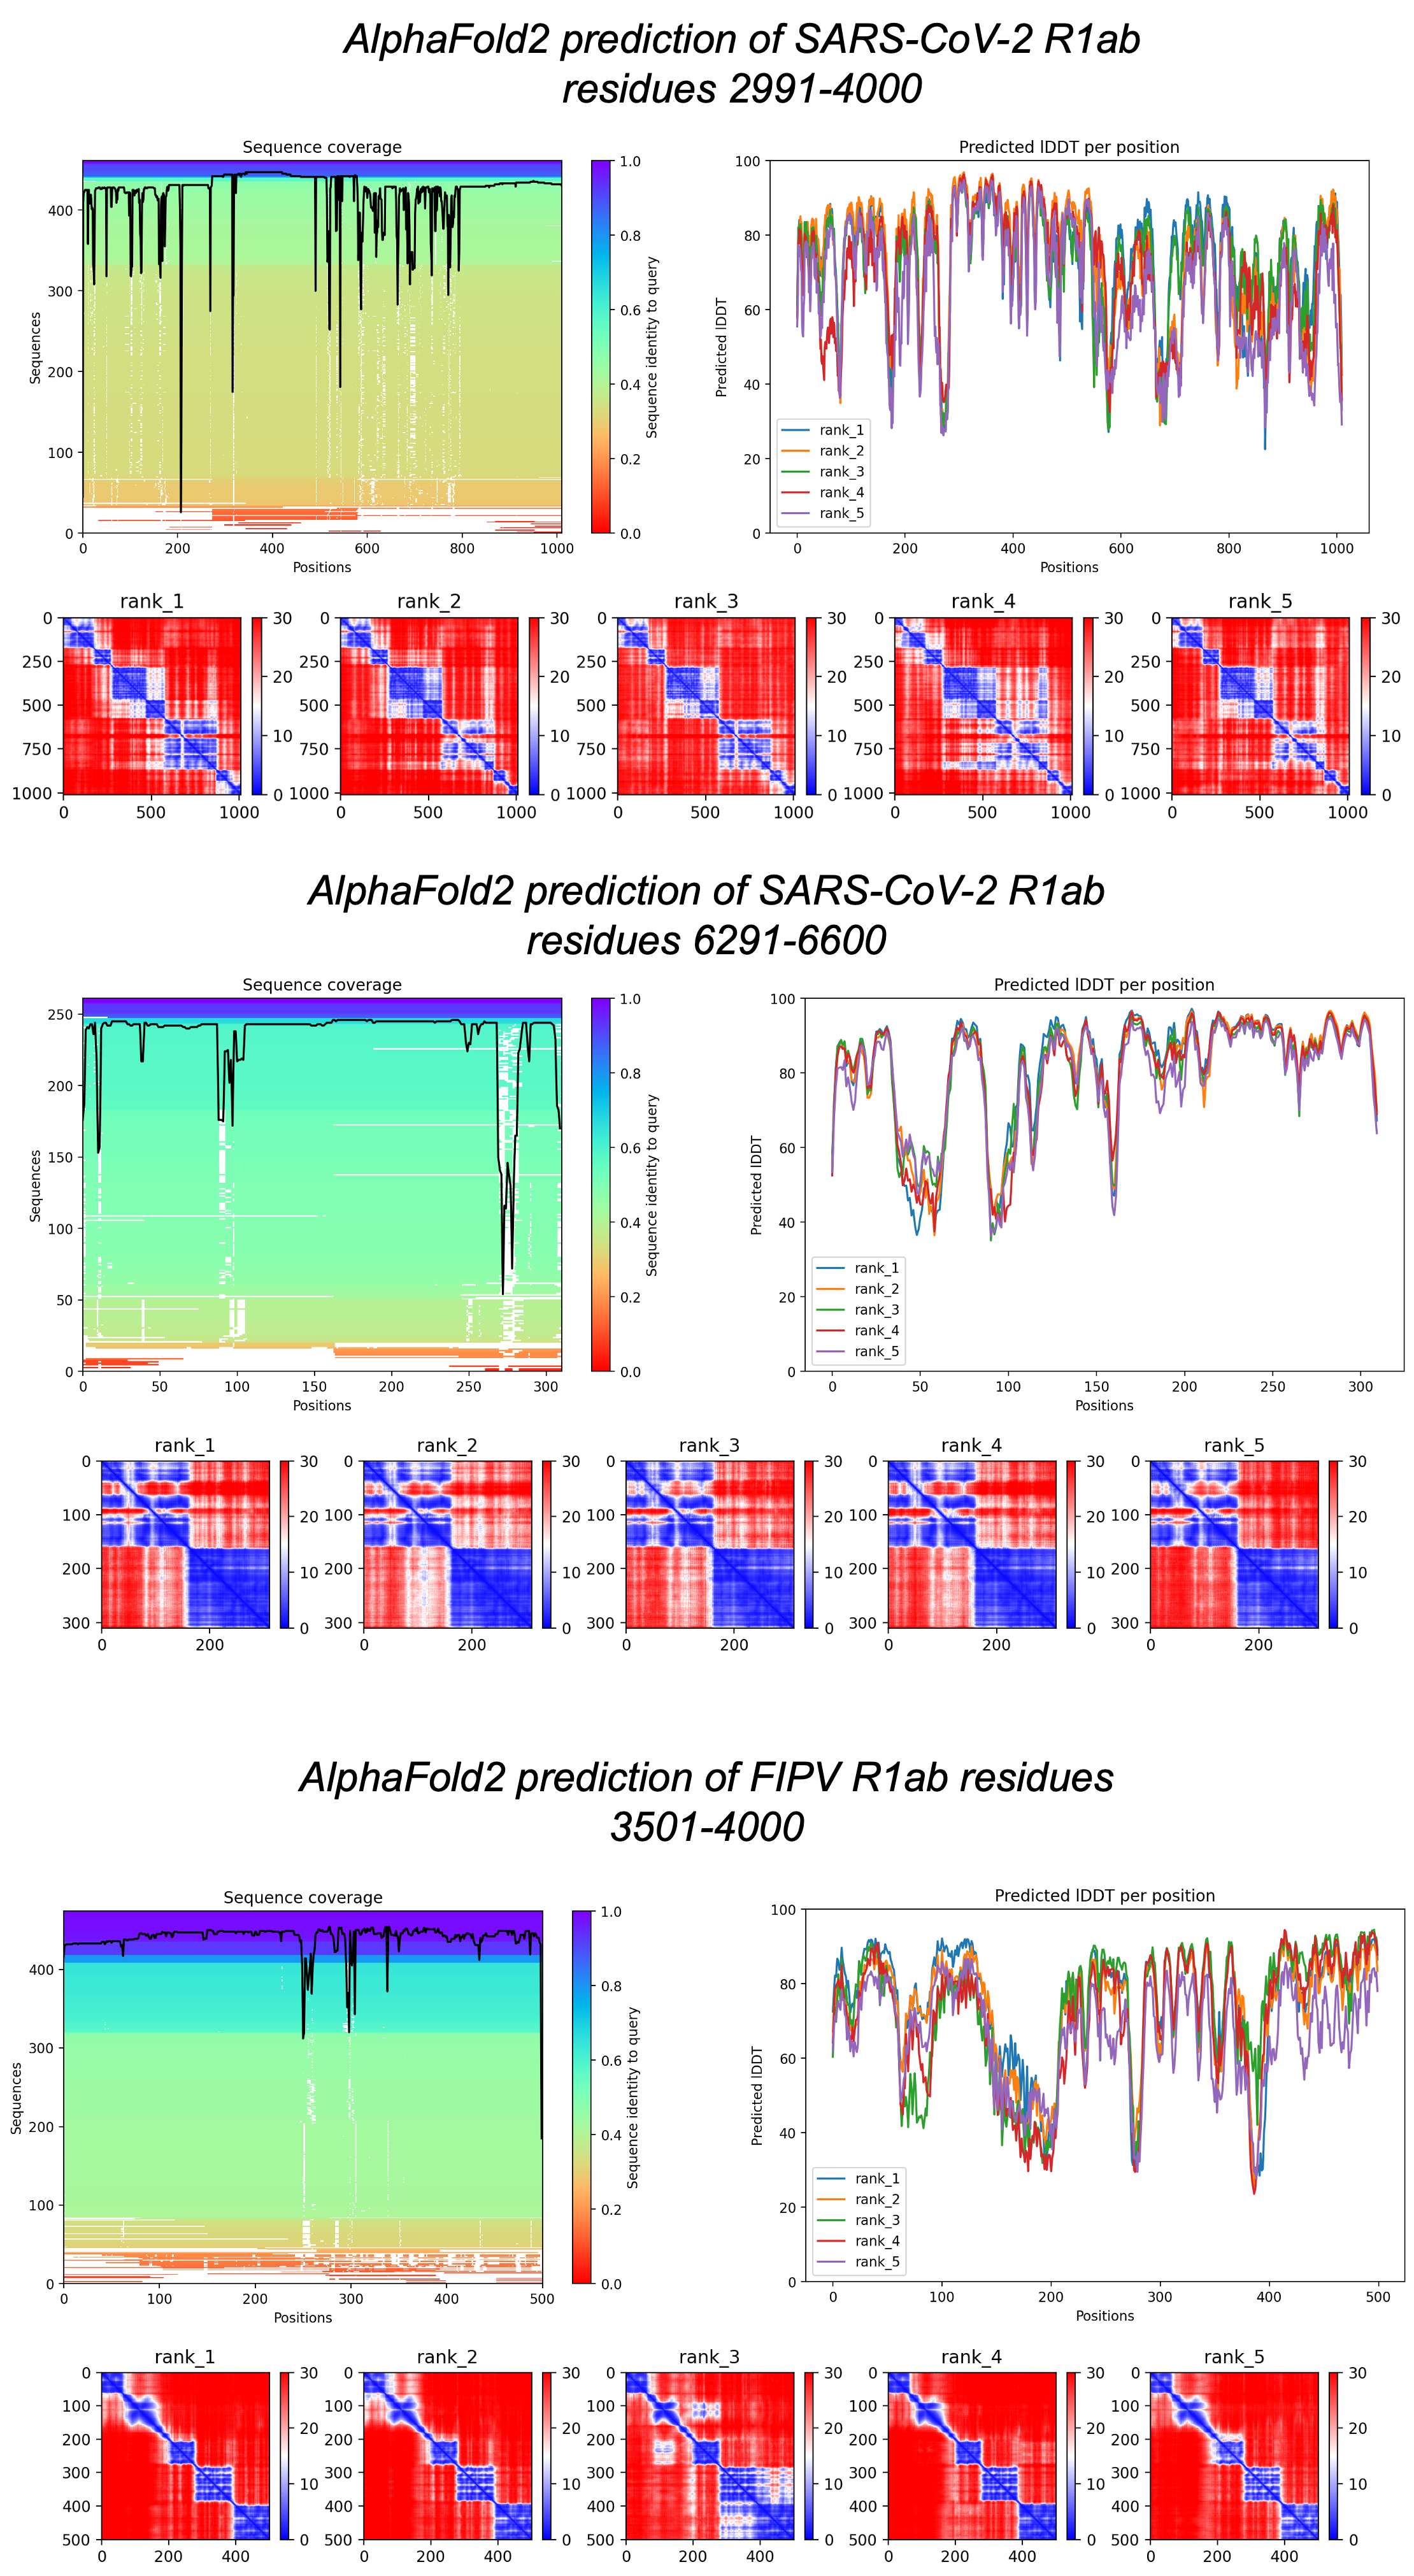


**Figure S1.** Results of the AlphaFold2 prediction through ColabFold server of the two moieties of SARS-CoV-2 R1ab between the residues 2991-4000 and 6291-6600 and FIPV R1ab residues 3501-4000. The graphs generated by ColabFold report **A)** the coverage of the sequences derived from the multiple sequence alignment (MSA) in UniRef100 server, **B)** the predicted local distance difference test (pLDDT) score for the 5 models generated and **C)** the predicted alignment error (PAE), indicating a distance score between pair of residues with low values specifying low errors.

**Figure S2.** Results of the 50 ns classical MD simulations of sars-rEp1(3574RTIKGTHHW3582) in complex with FLA-I H*00501. The peptide was sampled in two poses (extended and helix), as derived from molecular docking results. The screenshots were taken at 5, 25 and 50 ns. The plots report from the top to the bottom: RMSD of atom position in protein backbones with respect to the system as a function of time; number of H-bonds (blue bars) and contacts within 0.35 nm (orange bars) established in the MD as a function of time; short-range Coulomb (blue line) and Lennard-Jones (orange line) energies calculated for each timestep of the MD.

**Figure S3.** Results of the 50 ns classical MD simulations of fipv-rEp4(4533RLYYETLSY4541) in complex with FLA-I H*00501. The peptide was sampled in two poses (extended and helix), as derived from molecular docking results. The screenshots were taken at 5, 25 and 50 ns. The plots report from the top to the bottom: RMSD of atom position in protein backbones with respect to the system as a function of time; number of H-bonds (blue bars) and contacts within 0.35 nm (orange bars) established in the MD as a function of time; short-range Coulomb (blue line) and Lennard-Jones (orange line) energies calculated for each timestep of the MD.

**Figure S4.** Results of the 50 ns classical MD simulations of sars-sEp5(625HADQLTPTW633) in complex with FLA-I E*01001. The peptide was sampled in two poses (extended and helix), as derived from molecular docking results. The screenshots were taken at 5, 25 and 50 ns. The plots report from the top to the bottom: RMSD of atom position in protein backbones with respect to the system as a function of time; number of H-bonds (blue bars) and contacts within 0.35 nm (orange bars) established in the MD as a function of time; short-range Coulomb (blue line) and Lennard-Jones (orange line) energies calculated for each timestep of the MD.

**Figure S5.** Results of the 50 ns classical MD simulations of sars-sEp6(321QPTESIVRF329) in complex with FLA-I E*00701. The peptide was sampled in two poses (extended and helix), as derived from molecular docking results. The screenshots were taken at 5, 25 and 50 ns. The plots report from the top to the bottom: RMSD of atom position in protein backbones with respect to the system as a function of time; number of H-bonds (blue bars) and contacts within 0.35 nm (orange bars) established in the MD as a function of time; short-range Coulomb (blue line) and Lennard-Jones (orange line) energies calculated for each timestep of the MD.

**Figure S6.** Results of the 50 ns classical MD simulations of fipv-sEp8(771TTTPNFYYY779) in complex with FLA-I H*00501. The peptide was sampled in two poses (extended and helix), as derived from molecular docking results. The screenshots were taken at 5, 25 and 50 ns. The plots report from the top to the bottom: RMSD of atom position in protein backbones with respect to the system as a function of time; number of H-bonds (blue bars) and contacts within 0.35 nm (orange bars) established in the MD as a function of time; short-range Coulomb (blue line) and Lennard-Jones (orange line) energies calculated for each timestep of the MD.

**Figure S7.** Results of the 50 ns classical MD simulations of fipv-sEp9(1228TAYETVTAW1236) in complex with FLA-I H*00401. The peptide was sampled in two poses (extended and helix), as derived from molecular docking results. The screenshots were taken at 5, 25 and 50 ns. The plots report from the top to the bottom: RMSD of atom position in protein backbones with respect to the system as a function of time; number of H-bonds (blue bars) and contacts within 0.35 nm (orange bars) established in the MD as a function of time; short-range Coulomb (blue line) and Lennard-Jones (orange line) energies calculated for each timestep of the MD.
